# Supplementary material for: Simulation for skills training in neurosurgery: a systematic review, meta-analysis, and analysis of progressive scholarly acceptance
Source: Springer Nature journal article supplement (doi:10.1007/s10143-020-01378-0), 2020-09-18
Supplement: MOESM2 [file 18393948]

## **MAIN MANUSCRIPT FIGURES**

### **LIST OF FIGURE CAPTIONS**

**Fig 1 PRISMA flow chart** of the systematic process utilised for the review. Fifty-six articles were included in the final qualitative review with 32 in a quantitative meta-analysis including 7 randomised studies measuring various outcome domains.

**Fig 2 Knowledge Meta-analysis a)** Forest plot (top), outcome measures with focus primarily on knowledge assessment as a simulation domain. **b)** Forest plot (middle) outcome measure of procedural knowledge linked with using scoring systems for simulation. **c)** Forest Plot (bottom) of pooled studies investigating the outcome measure of knowledge together with procedural skill performed on various simulator types.

**Fig 3 Accuracy Meta-analysis** Forest Plot of pooled studies investigating outcome measure of accuracy. Supplementary data summarises the measures calculated for this domain in simulation and metanalysis results of measured improvement in accuracy. A random effect model as shown. Statistical significance set at  $P < 0.05$ .

**Fig 4 Speed meta-analysis a)** Additional data summarising the statistical analysis of the model estimates; a 3.95 times speed improvement from simulation was seen (top). **b)** Forest Plot showing pooled studies (bottom) analysing the outcome measure of speed as time to task completion. Some studies assessed speed using a surgical rehearsal platform and instrument trainer platform simulators, a marginal improvement in speed is seen.

**Supplementary Fig 1 Miscellaneous Meta-analysis on other metrics:** Significant moderately heterogeneous metanalysis of studies demonstrating improvement of other objectively measured safety parameters as outcome domains.

**Supplementary Fig 2** Metanalysis of other safety domains studied included a) fluoroscopy shots (top), b) comfort (bottom).

**Supplementary Fig 3** Cochrane Risk of Bias assessment for randomised trials. Inadequate standardisation protocols meant methods for blinding and reporting bias appeared prevalent in most of these studies.

**Supplementary Fig 4 PSA literature results.** PSA as a metric to gauge adoption of VR simulation in neurosurgical educational practice over a 20-year timeframe (1998-2018). **a)** Annual publication of initial (thin black) and refining (thick grey) reports. **b)** The number of annual initial (thin black) and

*refining (thick grey) studies compounded each year. (Adapted method from Schnurman & Kondziolka 2016).*

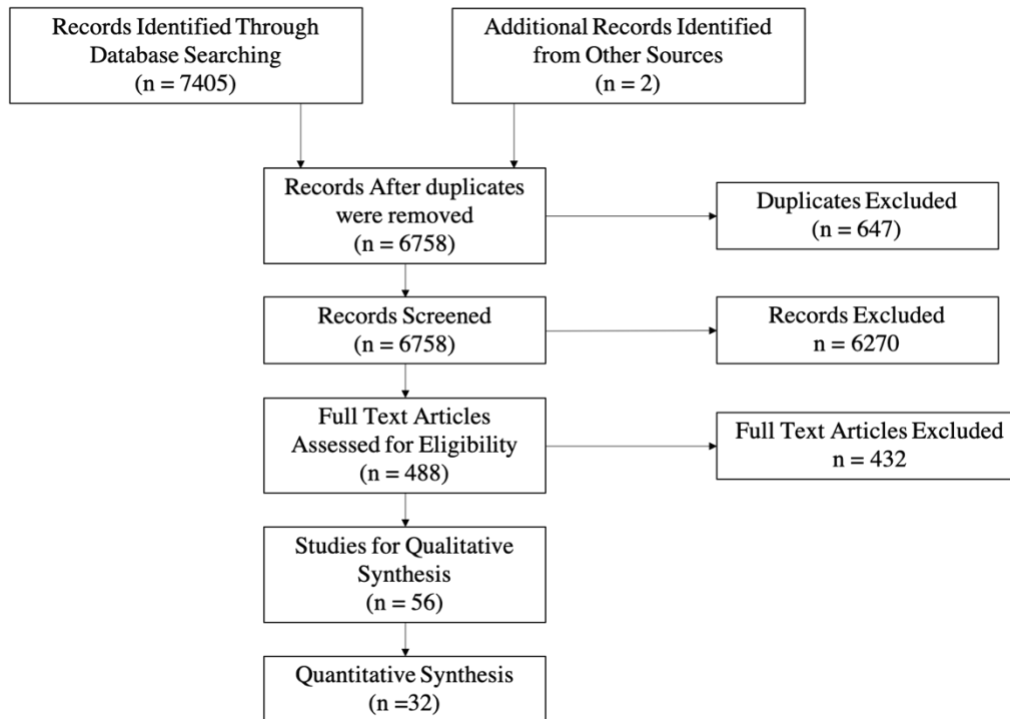

**Fig 1 PRISMA flow chart**

Knowledge only

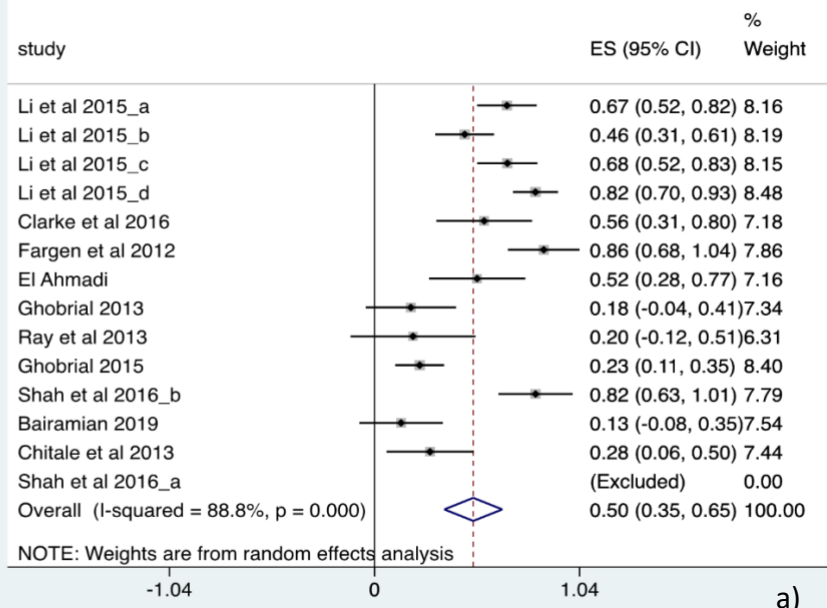

a)

Knowledge using scores

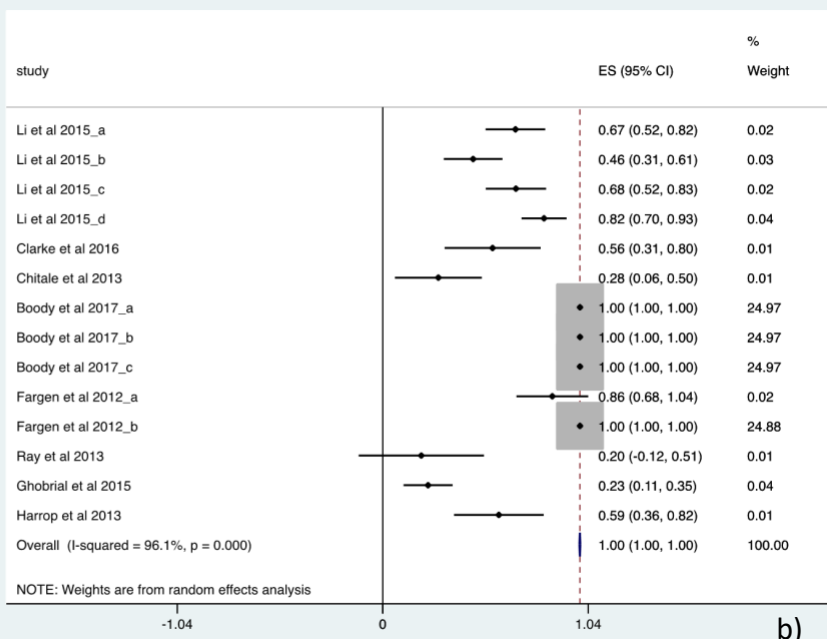

b)

# Knowledge pooled

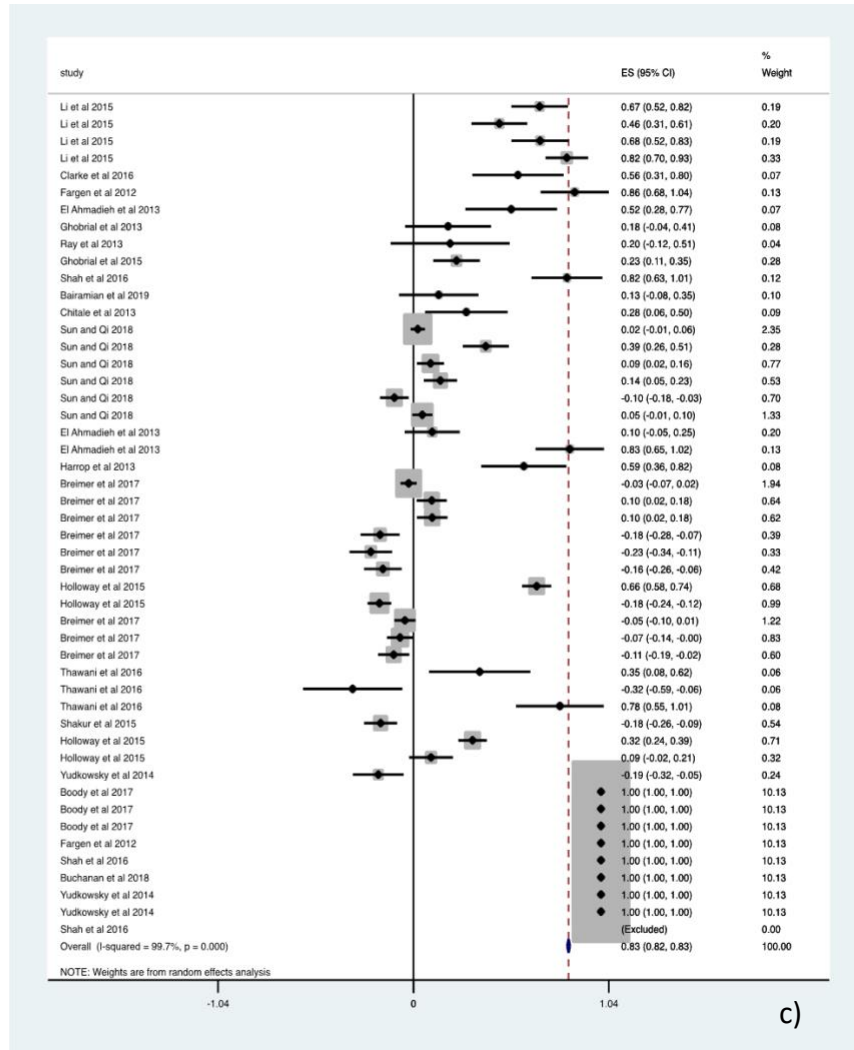

Fig 2 Knowledge Meta-analysis

Accuracy

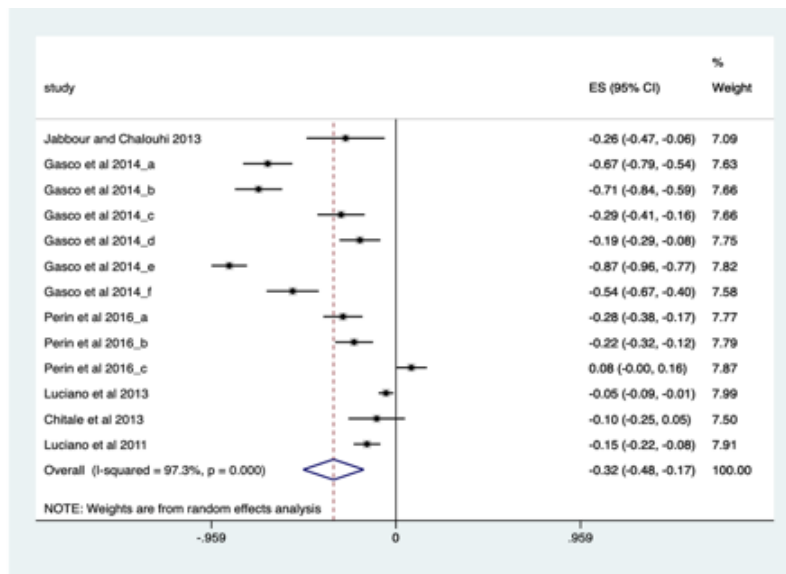

**Fig 3 Accuracy Meta-analysis**

Speed as time

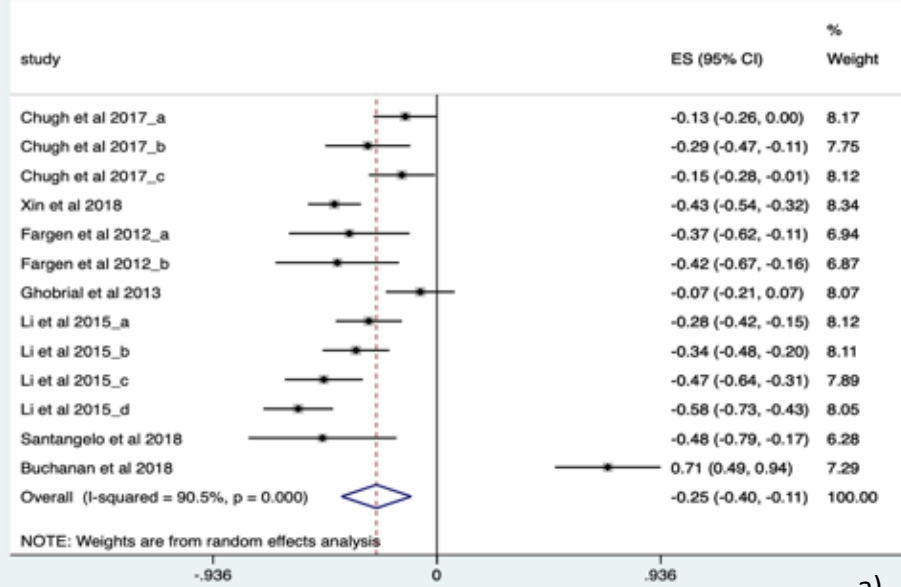

a)

Speed pooled

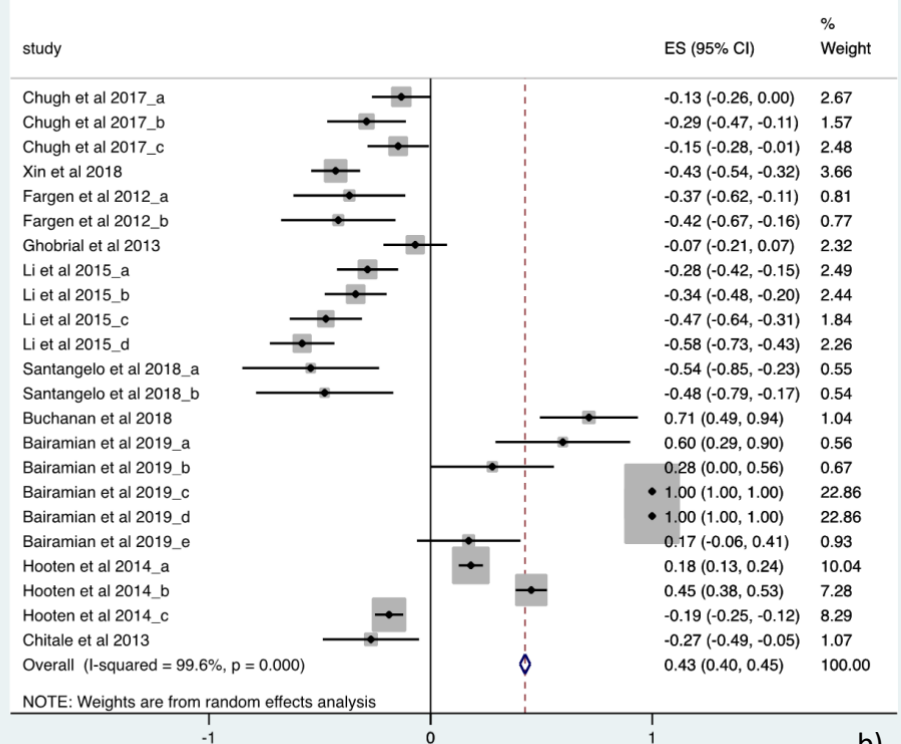

b)

Fig 4 Speed meta-analysis

**SUPPLEMENTARY FIGURES**

Safety others

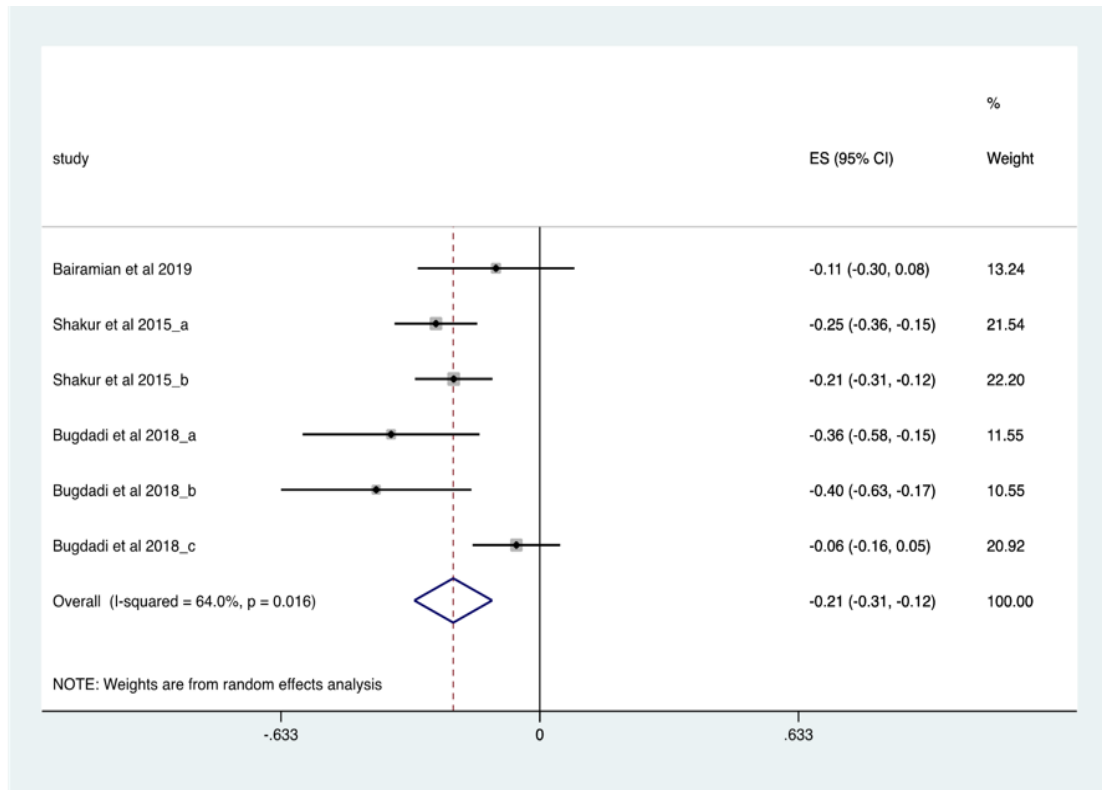

**Supplementary Fig 1**



Safety fluoroscopy shots

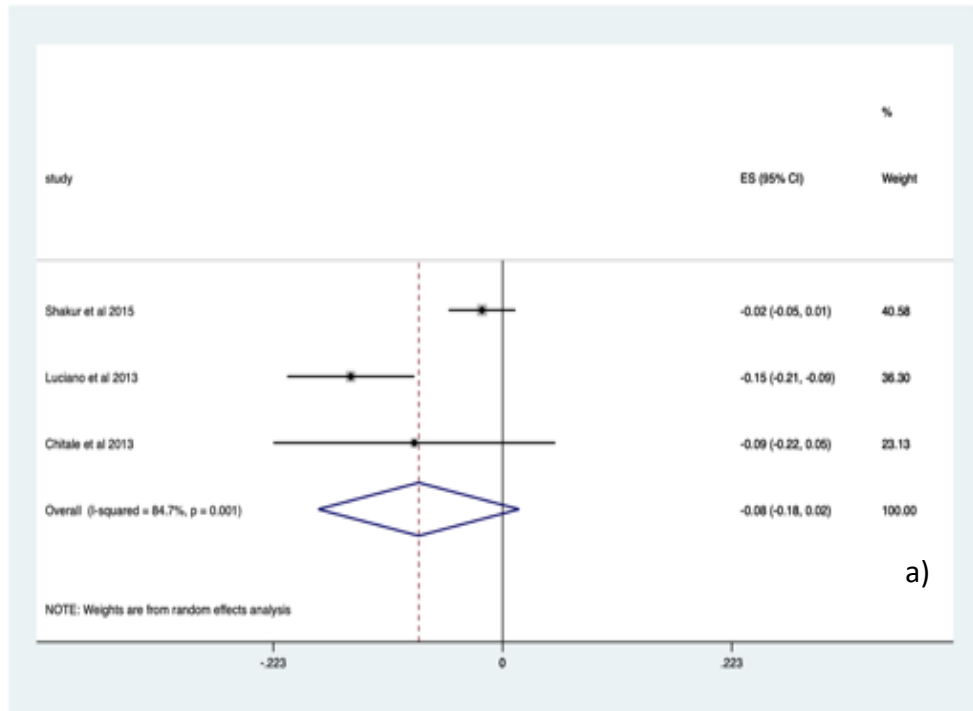

a)

Safety comfort

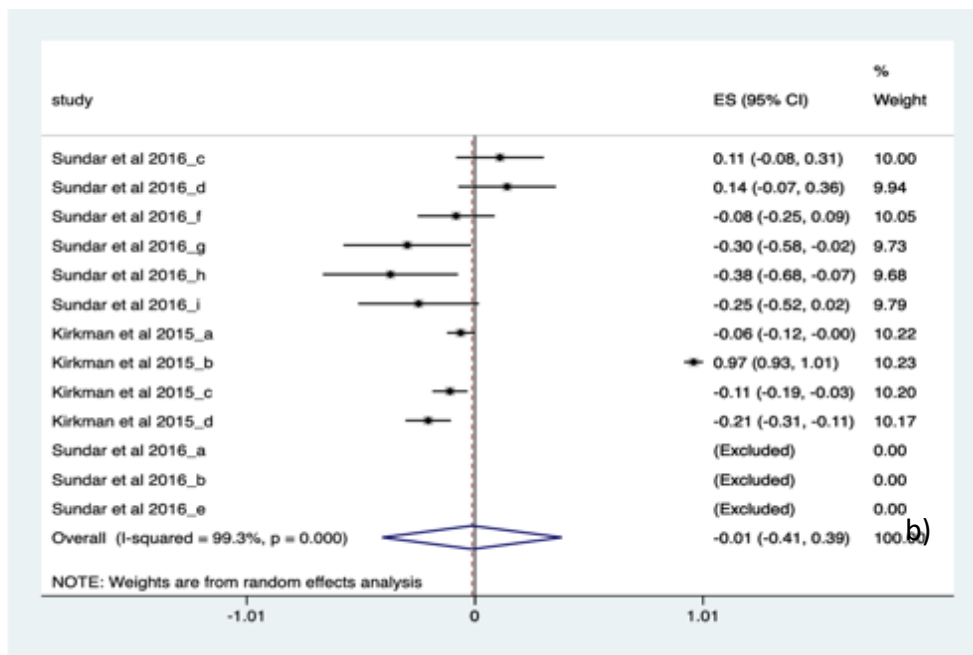

b)

Supplementary Fig 2

| Author                    | Random Sequence Generation | Allocation Concealment | Blinding of Participants & Personnel | Blinding of Outcome Assessment | Incomplete Outcome data | Selective Reporting | Other Bias |
|---------------------------|----------------------------|------------------------|--------------------------------------|--------------------------------|-------------------------|---------------------|------------|
| <u>Bekeles et al 2017</u> | +                          | ?                      | +                                    | ?                              | ?                       | ?                   | ?          |
| <u>Chugh et al 2017</u>   | +                          | ?                      | +                                    | ?                              | +                       | -                   | ?          |
| <u>Boody et al 2017</u>   | +                          | ?                      | +                                    | +                              | +                       | +                   | +          |
| <u>Clarke et al 2016</u>  | +                          | +                      | +                                    | ?                              | ?                       | +                   | ?          |
| <u>Sun &amp; Chi 2018</u> | +                          | ?                      | +                                    | ?                              | +                       | ?                   | -          |
| <u>Sundar et al 2016</u>  | +                          | -                      | +                                    | ?                              | ?                       | ?                   | ?          |
| <u>Xin et al 2018</u>     | +                          | +                      | +                                    | ?                              | +                       | +                   | ?          |
| <u>Patel et al 2014</u>   | ?                          | -                      | -                                    | ?                              | +                       | ?                   | -          |

**Bias assessments for randomised studies using Cochrane risk of bias tool.**

*Supplementary Fig 3*

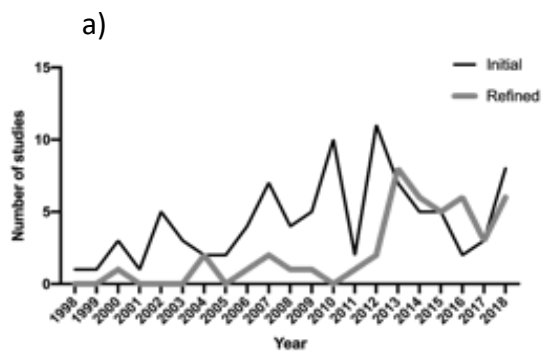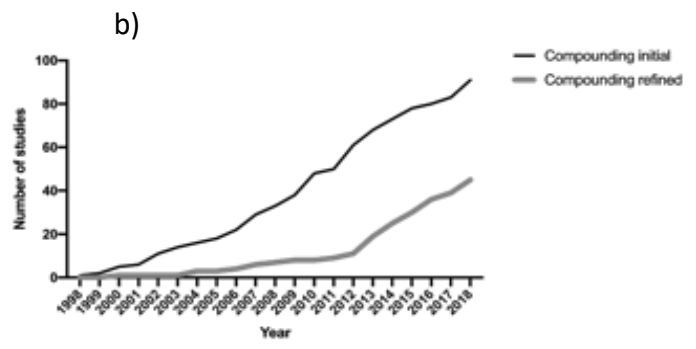

Supplementary Fig 4:
